# Supplementary material
Source: PubMed Central journal article supplement (PMC9939054)
Supplement: NIHMS1865456-supplement-1.pdf [file NIHMS1865456-supplement-1.pdf]

**Supplementary Information:**

**Genomic and phenotypic characterization of 404 individuals with neurodevelopmental disorders caused by CTNNB1 variants**

Kayumi, et al.

## **Methods and Materials:**

### *Reverse transcription polymerase chain reaction (RT-PCR)*

Relative amounts of endogenous and exogenous *CTNNB1* mRNA were quantified by RT-PCR. HEK293T cells transfected with  $\beta$ -catenin expression constructs and luciferase reporter plasmids were homogenized in TRIzol reagent (Invitrogen, Cat# 15596026) and RNA was isolated using RNeasy kit (QIAGEN, Cat#74104). Complementary DNA (cDNA) was synthesized using random hexamers and the SuperScript IV First-Strand Synthesis System (Invitrogen, Cat# 18091050). Total endogenous and exogenous *CTNNB1* mRNA was detected by primers targeting N-terminal *CTNNB1* cDNA sequence. Exogenous *CTNNB1* mRNA was detected by primers with sequences of a Myc tag or a V5 tag. Equal abundance of total cDNA among samples was confirmed by assessing expression of the housekeeping gene esterase D. Sequences of primers used in RT-PCR can be found in a Supplementary Table 12.

## List of supplementary tables

Table\_S1: Detailed phenotype summaries of unpublished 52 individuals.

Table\_S2: List of references to previously published studies from which we collected *CTNNB1* variants and clinical data for the present study.

Table\_S3: Detailed phenotype summaries of previously published 352 individuals.

Table\_S4: Summaries of exclusion criteria applied to *CTNNB1* variants identified in clinical genetic databases.

Table\_S5: Summary of cloning strategies of *CTNNB1* variants tested in TOPFlash dual-luciferase reporter assay.

Table\_S6: Summaries of a cohort of 120 individuals from 52 unpublished and 68 selected, previously published individuals with sufficient clinical information.

Table\_S7: Comparison of the frequency of traits between unpublished and previously published individuals.

Table\_S8: Comparison of the frequency of traits between individuals with or without a diagnosis of cerebral palsy.

Table\_S9: Summary of diagnostic tests performed prior to discovery of pathogenic *CTNNB1* variants.

Table\_S10: Comparison of the frequency of traits between different sex.

Table\_S11: Ratio of different types of *CTNNB1* variants identified in population and neurodevelopmental disorders (NDD).

Table\_S12: Primer sequences designed for RT-PCR.

Table\_S13: List of *CTNNB1* variants identified in neurodevelopmental disorders with the number of observations in unrelated individuals.

**A**

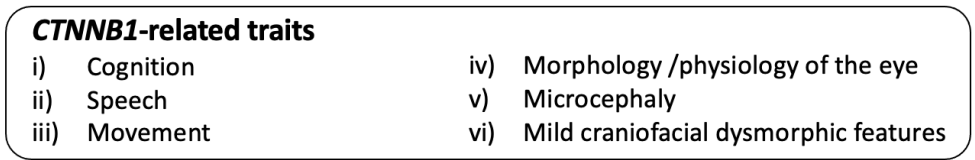

**B**

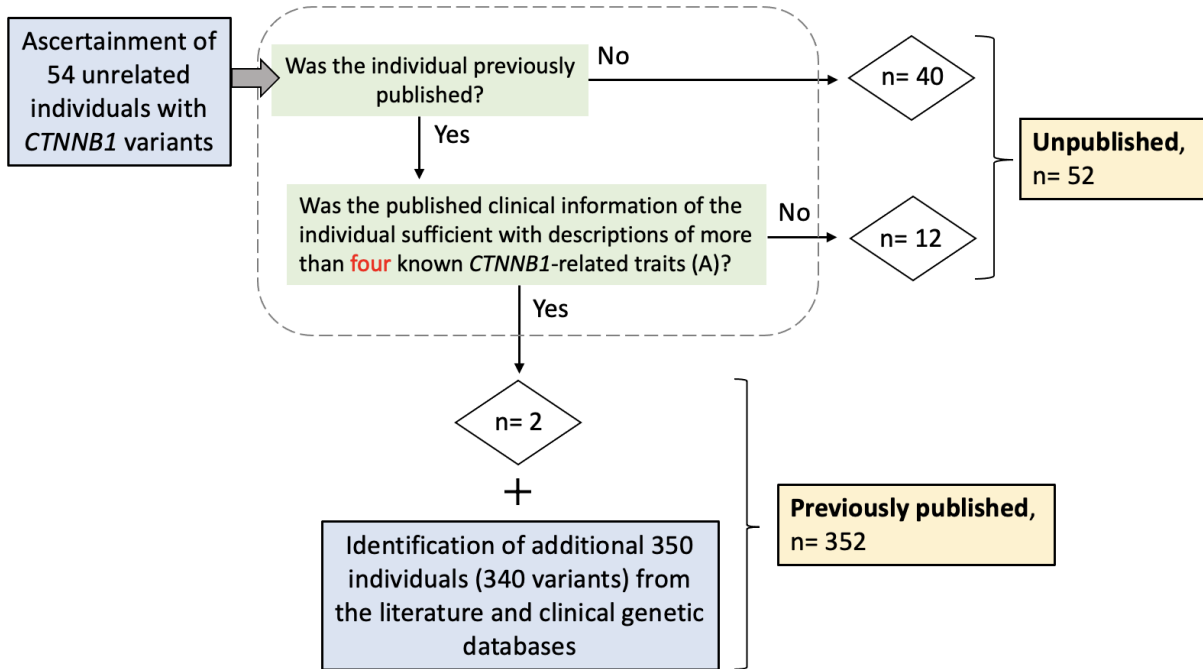

**C**

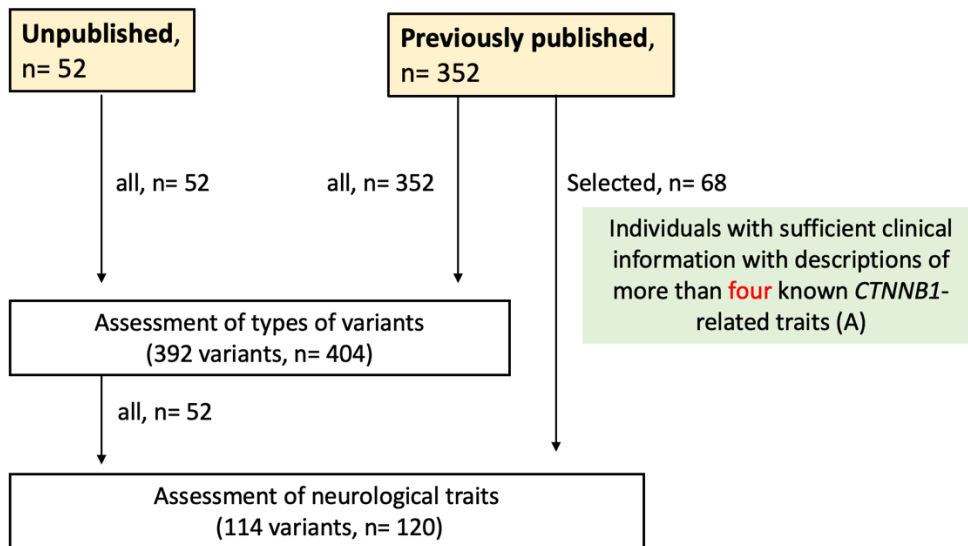

Supplementary Figure 1. Identification of 52 unpublished and 352 previously published individuals carrying *CTNNB1* deleterious variants and study design. (A) A summary of six *CTNNB1*-related traits that were defined from previous clinical reviews of individuals carrying pathogenic *CTNNB1* variants. (B) A flow chart shows how we identified 52 unpublished and 352 previously published individuals with *CTNNB1* deleterious variants. (C) A flow chart summarizes design of this study.

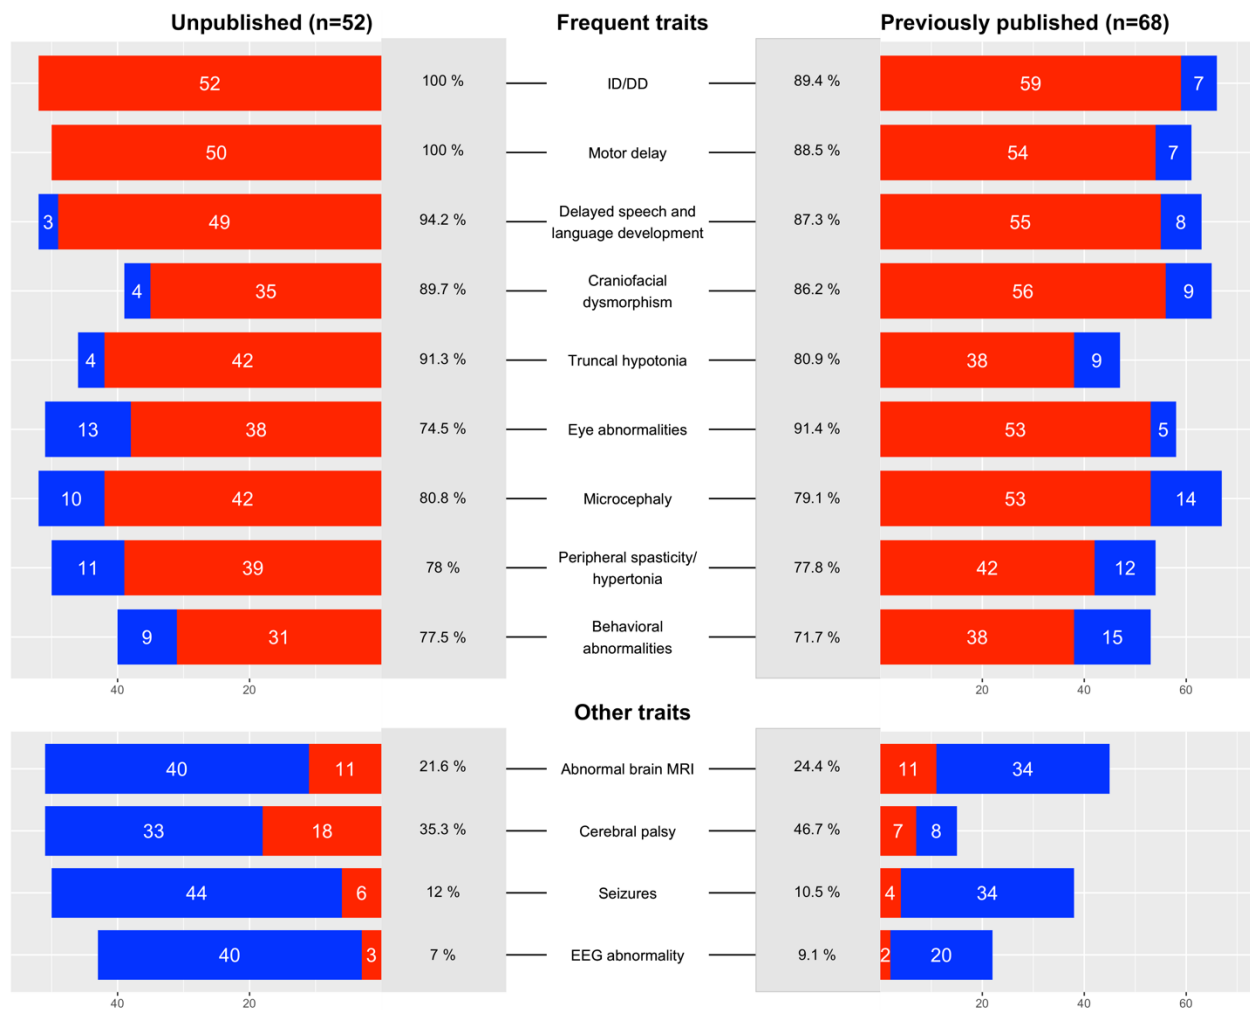

Supplementary Figure 2. Comparison of the frequency of traits between unpublished and previously published individuals. Neurological traits which were frequently identified in unpublished (left) and previously published (right) individuals are summarized at the top. Other relevant traits discussed in the present study are summarized at the bottom. Bar charts show the number of affected (red) and unaffected (blue) individuals per trait. The length of bars reflects the number of individuals with available information per trait. The percentages of affected individuals to total reported cases are shown in the grey boxes.

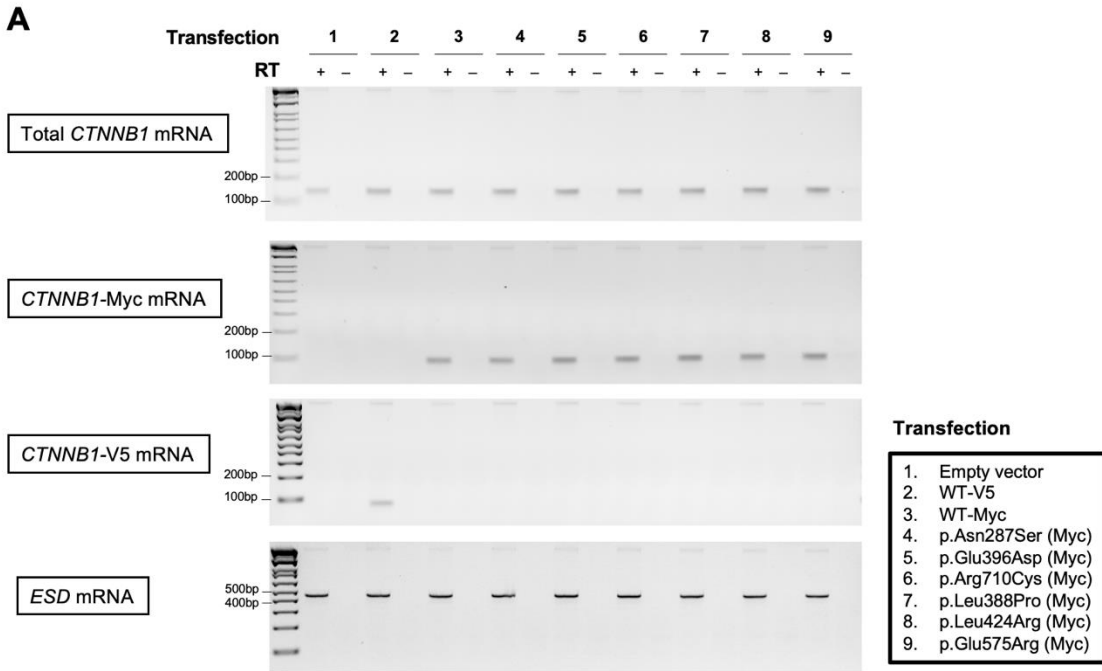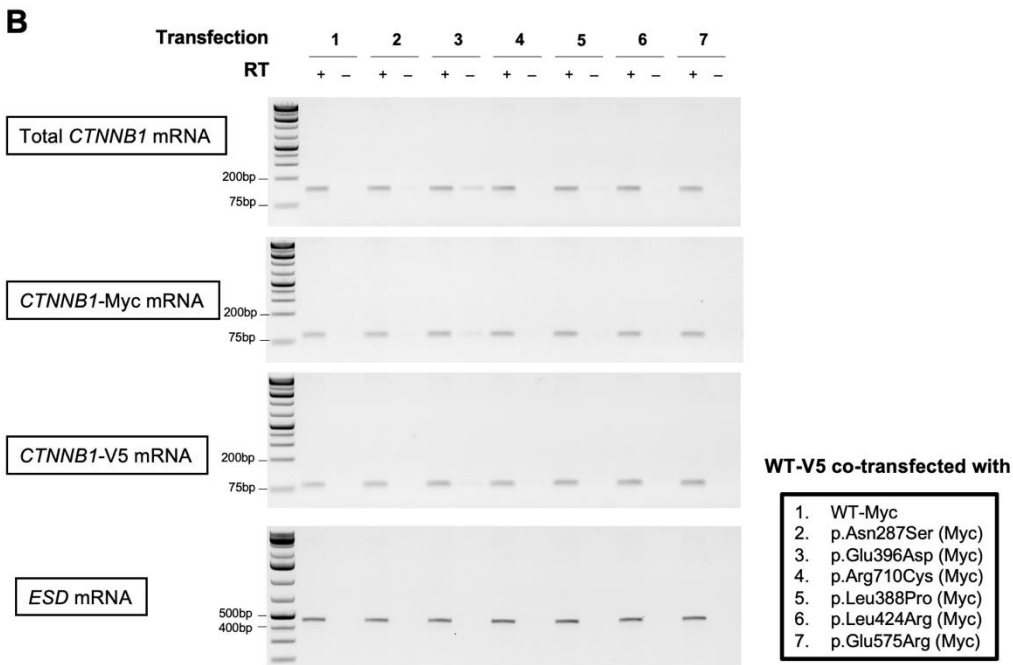

Supplementary Figure 3. Expression of Myc or V5-tagged wildtype  $\beta$ -catenin proteins and Myc-tagged mutant  $\beta$ -catenin proteins transfected into HEK293T cells detected by reverse transcription polymerase chain reaction (RT-PCR). Reverse transcription polymerase chain reaction (RT-PCR) was performed to detect mRNA expression of Myc or V5-tagged wildtype



(WT)  $\beta$ -catenin transcripts and Myc-tagged mutant  $\beta$ -catenin transcripts. Expression constructs were transfected without co-transfection (A) and with co-transfection of a V5-tagged wildtype  $\beta$ -catenin (B). Synthesis of complementary DNA (cDNA) from RNA was performed in the presence (+) or absence (-) of reverse transcriptase (RT). Total *CTNNB1* mRNA was detected with primers which amplify *CTNNB1* coding region (proximal to the N terminus). Exogenous *CTNNB1* mRNA (CTNNB1-Myc or CTNNB1-V5) were selectively amplified using a primer containing a Myc tag or a V5 tag sequence. Amplifications with primers specific to esterase D (ESD) cDNA were performed to confirm success of cDNA synthesis in samples treated with RT.

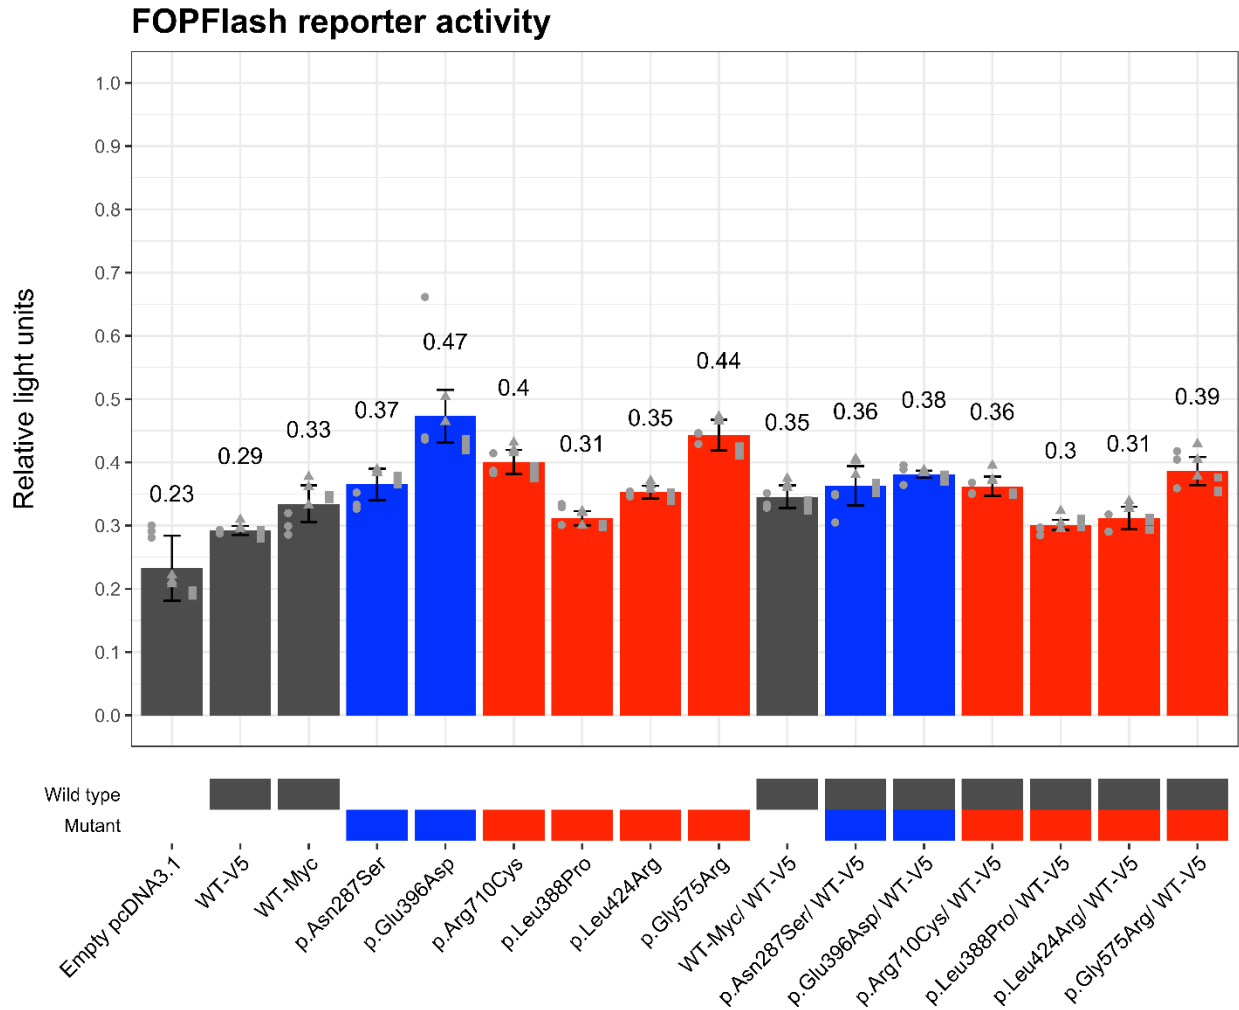

Supplementary Figure 4. CTNNB1 constructs had minimal effects on luciferase reporter gene expression in the absence of wild type LEF/TCF responsive elements. Relative luciferase activity measured from the FOPFlash reporter construct in HEK293T cells co-transfected with expression vectors for wildtype  $\beta$ -catenin or mutant  $\beta$ -catenin or an equal mix with wildtype  $\beta$ -catenin tagged with V5. Wild type, gnomAD variants, and pathogenic/likely pathogenic variants are highlighted in grey, blue, and red on the X-axis labels, respectively. Assay was performed in triplicate (shown with different shaped data points) with three technical replicate samples for each assay. Error bars indicate standard deviations between the three independent experiments. Results indicate a functional LEF/TCF binding site is required for transactivation.

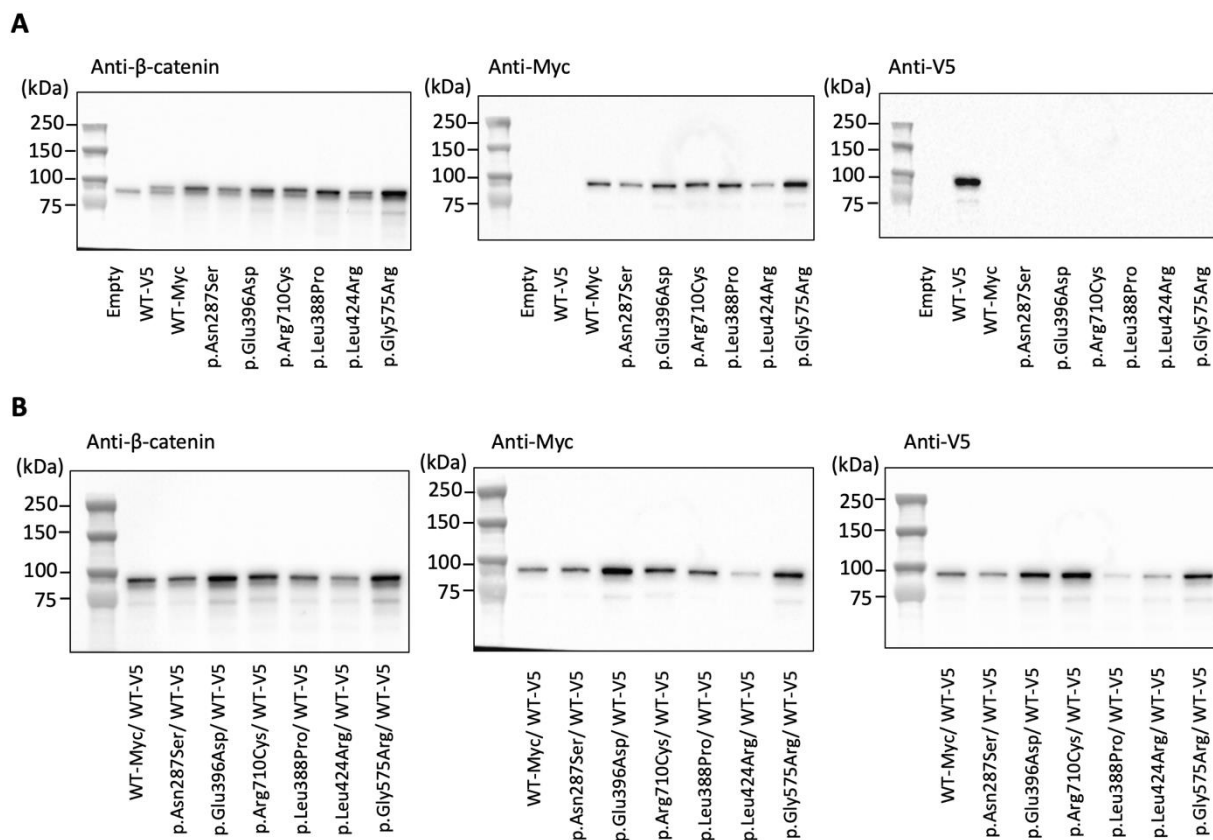

Supplementary Figure 5. Full blots of western blots shown in Figure 5A and 5B in the main text.

(A) Detection of wild-type (WT) and mutant  $\beta$ -catenin proteins transfected as solo into HEK293T cells by western blot, shown in Figure 5A in the main text. (B) Detection of wildtype and mutant  $\beta$ -catenin proteins co-transfected with a V5-tagged wildtype  $\beta$ -catenin into HEK293T cells by western blot, shown in Figure 5B in the main text. Endogenous and exogenous  $\beta$ -catenin were detected with a  $\beta$ -catenin antibody (Anti-  $\beta$ -catenin, left). Myc-tagged wild-type and mutant  $\beta$ -catenin were detected with an anti-Myc antibody (Anti-Myc, middle). A V5-tagged wildtype  $\beta$ -catenin was detected with an anti-V5 antibody (Anti-V5, right).

Supplementary Table 5: Summary of cloning strategies of *CTNNB1* variants tested in TOPFlash dual-luciferase reporter assay.

| Variant / purpose                                 | Primer                                                   | Sequences (5' -> 3')                                                              | Orientation | Primer pair for PCR | Annealing temperature (°C) | Cloning strategy                                                                                                                                                            |
|---------------------------------------------------|----------------------------------------------------------|-----------------------------------------------------------------------------------|-------------|---------------------|----------------------------|-----------------------------------------------------------------------------------------------------------------------------------------------------------------------------|
| Overlap PCR                                       | T7                                                       | TAATACGACTCACTA TAGGG                                                             | Forward     |                     |                            |                                                                                                                                                                             |
| Overlap PCR                                       | CTNNB1_c598 (F1)                                         | CGTACCATGCAGAA TACAAATG                                                           | Forward     |                     |                            |                                                                                                                                                                             |
| Overlap PCR                                       | CTNNB1_c1123 (F2)                                        | CAACGTCTTGTTTCAG AACTG                                                            | Forward     |                     |                            |                                                                                                                                                                             |
| Overlap PCR                                       | CTNNB1_c1973 (R1)                                        | ACAGCAGCTGCATA TGTCG                                                              | Reverse     |                     |                            |                                                                                                                                                                             |
| Overlap PCR                                       | pcDNA_vector (R2)                                        | CCATTGAGTTTAAAC CCGCTG                                                            | Reverse     |                     |                            |                                                                                                                                                                             |
| Substitution of a C-terminal tag                  | CTNNB1_myc_R (sequence of a Myc tag highlighted in red.) | TGGTGATGATGACC<br>GGTACGCAGATCCTC<br>TTCTGAGATGAGTTT<br>TTGTTCTTCGAAGGG<br>CCCTCT | Reverse     | F2                  | 62.0                       | PCR product was purified and digested with AgeI (NEB# R3552S) and EcoRI (NEB# R3101S) prior to ligation into a vector digested with the same set of restriction enzymes.    |
| NM_001904.3: c.860A>G: p.Asn287Ser (rs35288908)   | Fragment 1                                               | ATGGTTGCCTTGCTC AGCAAAACAAATGT TA                                                 | Forward     | R1                  | 72.0                       | Equal amount of fragment 1 and 2 were mixed in PCR reaction with outer primers (T7 x R1). Amplified product and a vector were digested with Bsu36I (NEB# R0524S) and EcoRI. |
|                                                   | Fragment 2                                               | AACATTTGTTTTGCT GAGCAAGGCAACCA TT                                                 | Reverse     | T7                  | 62.0                       |                                                                                                                                                                             |
| NM_001904.3: c.1188A>C: p.Glu396Asp (rs751375496) | Fragment 1                                               | CTGCAACTAAACAG GACGGGATGGAAGG TC                                                  | Forward     | R1                  | 72.0                       |                                                                                                                                                                             |
|                                                   | Fragment 2                                               | GAGACCTTCCATCCC GTCCTGTTTAGTTGC                                                   | Reverse     | T7                  | 62.0                       |                                                                                                                                                                             |
| NM_001904.3:                                      | Fragment 1                                               | TGGACTCTCAGGAAT CCTTCAGATGCTGCA AC                                                | Forward     | R1                  | 72.0                       | Equal amount of fragment 1 and 2 were mixed in PCR                                                                                                                          |

| Variant / purpose                                          | Primer     | Sequences (5' -> 3')                      | Orientation | Primer pair for PCR | Annealing temperature (°C) | Cloning strategy                                                                                                                                                                                                                                                                                      |
|------------------------------------------------------------|------------|-------------------------------------------|-------------|---------------------|----------------------------|-------------------------------------------------------------------------------------------------------------------------------------------------------------------------------------------------------------------------------------------------------------------------------------------------------|
| c.1163T>C:<br>p.Leu388Pro<br>(rs1559474140)                | Fragment 2 | TAGTTGCAGCATCTG<br>AAGGATTCCTGAGA<br>GTC  | Reverse     | T7                  | 66.7                       | reaction with outer primers (T7 x R1). Amplified product was digested with BamHI (R3136S) and EcoRI and cloned into a pcDNA3.1-CTNNB1-V5 vector digested with the same set of enzymes. For this variant only, the V5 tag was replaced with the Myc tag after insertion of CTNNB1 variant of interest. |
| NM_001904.3:<br>c.1271T>G:<br>p.Leu424Arg<br>(rs863224864) | Fragment 1 | CTGTGCAGCTGGAAT<br>TCGTTCTAACCTCAC<br>TTG | Forward     | R2                  | 72.0                       | Equal amount of fragment 1 and 2 were mixed in PCR reaction with outer primers (F1 x R2). Amplified product and a vector were digested with AgeI and EcoRI.                                                                                                                                           |
|                                                            | Fragment 2 | AGTGAGGTTAGAAC<br>GAATTCCAGCTGCAC<br>AGGT | Reverse     | F1                  | 62.0                       |                                                                                                                                                                                                                                                                                                       |
| NM_001904.3:<br>c.1723G>A:<br>p.Gly575Arg<br>(rs797044875) | Fragment 1 | GTTGAAGGTTGTACC<br>AGAGCCCTTCACATC        | Forward     | R2                  | 62.0                       | Equal amount of fragment 1 and 2 were mixed in PCR reaction with outer primers (F2 x R2). Amplified product and a vector were digested with AgeI and EcoRI.                                                                                                                                           |
|                                                            | Fragment 2 | TGTGAAGGGCTCTG<br>GTACAACCTTCAACT<br>A    | Reverse     | F2                  | 62.0                       |                                                                                                                                                                                                                                                                                                       |
| NM_001904.3:<br>c.2128C>T:<br>p.Arg710Cys<br>(rs748653573) | Fragment 1 | AACCCCTTGGATATT<br>GCCAGGATGATCC          | Forward     | R2                  | 72.0                       | Equal amount of fragment 1 and 2 were mixed in PCR reaction with outer primers (F2 x R2). Amplified product and a vector were digested with AgeI and EcoRI.                                                                                                                                           |
|                                                            | Fragment 2 | TAGGATCATCCTGGC<br>AATATCCAAGGGGT<br>TC   | Reverse     | F2                  | 62.0                       |                                                                                                                                                                                                                                                                                                       |

“c” in name of primers refers to a position at CTNNB1 cDNA coordinate (NM\_001904.3).

**Supplementary Table 11: Ratio of different types of *CTNNB1* variants identified in population and neurodevelopmental disorders (NDD).**

| Variant type        | Population<br>(gnomAD) |           | NDD   |           |
|---------------------|------------------------|-----------|-------|-----------|
|                     | Count                  | Ratio (%) | Count | Ratio (%) |
| Synonymous          | 14826                  | 90.96     | 0     | 0.00      |
| Missense            | 612                    | 3.75      | 28    | 7.14      |
| Stopgain            | 0                      | 0.00      | 176   | 44.90     |
| Frameshift          | 0                      | 0.00      | 141   | 35.97     |
| In-frame            | 5                      | 0.03      | 1     | 0.26      |
| Splicing            | 2                      | 0.01      | 32    | 8.16      |
| Splice site         | 854                    | 5.24      | 6     | 1.53      |
| Structural variants | 0                      | 0.00      | 8     | 2.04      |
| Start lost          | 1                      | 0.01      | 0     | 0.00      |
| Total (n)           | 16300                  |           | 392   |           |

**Supplementary Table 12: Primer sequences designed for RT-PCR.**

| Target             | Primer orientation | Sequence (5' -> 3')       |
|--------------------|--------------------|---------------------------|
| ESD (housekeeping) | Forward            | GGAGCTTCCCCAACTCATAAATGCC |
|                    | Reverse            | GCATGATGTCTGATGTGGTCAGTAA |
| Total CTNNB1 mRNA  | Forward            | CAGAGTGCTGAAGGTGCTATC     |
|                    | Reverse            | ATTCCTGAGAGTCCAAAGACAG    |
| CTNNB1-Myc mRNA    | Forward            | CAATCAGCTGGCCTGGTTTG      |
|                    | Reverse            | GATGATGACCGGTACGCAGA      |
| CTNNB1-V5 mRNA     | Forward            | CAATCAGCTGGCCTGGTTTG      |
|                    | Reverse            | TCGAGACCGAGGAGAGGGTTA     |



Click here to access/download  
**Large Excel File**  
Table\_S1.xlsx







Click here to access/download  
**Large Excel File**  
Table\_S2.xlsx





Click here to access/download  
**Large Excel File**  
Table\_S3.xlsx





Click here to access/download  
**Large Excel File**  
Table\_S4.xlsx





Click here to access/download  
**Large Excel File**  
Table\_S6.xlsx





Click here to access/download  
**Large Excel File**  
Table\_S7.xlsx





Click here to access/download  
**Large Excel File**  
Table\_S8.xlsx





Click here to access/download  
**Large Excel File**  
Table\_S9.xlsx



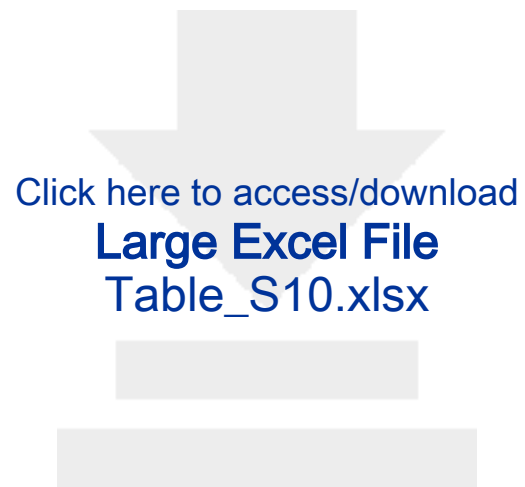





Click here to access/download  
**Large Excel File**  
Table\_S13.xlsx



DNA Variant HGVS nomenclature verification

| Input Errors and warnings  | AccNo                | Genesymbol        | Variant                   | Reference                 |
|----------------------------|----------------------|-------------------|---------------------------|---------------------------|
| Sequence Start             | Descr.               | Coding DNA Descr. | Protein Descr.            | GeneSymbol                |
| Coding DNA Descr.          | GeneSymbol           | Protein Descr.    | Genomic Reference         | Coding Reference          |
| Protein Reference          | Affected Transcripts | Affected Proteins | Restriction Sites Created | Restriction Sites Deleted |
| NC_000003.11:g.41266201G>A |                      |                   |                           |                           |

NC\_000003.11 (CTNNB1\_v001):c.198G>A|NC\_000003.11 (CTNNB1\_v002):c.198G>A|NC\_000003.11 (CTNNB1\_v003):c.198G>A|NC\_000003.11 (CTNNB1\_v004):c.198G>A|NC\_000003.11 (CTNNB1\_v005):c.198G>A|NC\_000003.11 (CTNNB1\_v006):c.198G>A|NC\_000003.11 (CTNNB1\_v007):c.177G>A

NC\_000003.11 (CTNNB1\_i001):p. (Trp66\*) |NC\_000003.11 (CTNNB1\_i002):p. (Trp66\*) |NC\_000003.11 (CTNNB1\_i003):p. (Trp66\*) |NC\_000003.11 (CTNNB1\_i004):p. (Trp66\*) |NC\_000003.11 (CTNNB1\_i005):p. (Trp66\*) |NC\_000003.11 (CTNNB1\_i006):p. (Trp66\*) |NC\_000003.11 (CTNNB1\_i007):p. (Trp59\*)  
 NC\_000003.11:g.41266214dupT

NC\_000003.11 (CTNNB1\_v001):c.211dup|NC\_000003.11 (CTNNB1\_v002):c.211dup|NC\_000003.11 (CTNNB1\_v003):c.211dup|NC\_000003.11 (CTNNB1\_v004):c.211dup|NC\_000003.11 (CTNNB1\_v005):c.211dup|NC\_000003.11 (CTNNB1\_v006):c.211dup|NC\_000003.11 (CTNNB1\_v007):c.190dup

NC\_000003.11 (CTNNB1\_i001):p. (Ser71Phefs\*11) |NC\_000003.11 (CTNNB1\_i002):p. (Ser71Phefs\*11) |NC\_000003.11 (CTNNB1\_i003):p. (Ser71Phefs\*11) |NC\_000003.11 (CTNNB1\_i004):p. (Ser71Phefs\*11) |NC\_000003.11 (CTNNB1\_i005):p. (Ser71Phefs\*11) |NC\_000003.11 (CTNNB1\_i006):p. (Ser71Phefs\*11) |NC\_000003.11 (CTNNB1\_i007):p. (Ser64Phefs\*11)  
 NC\_000003.11:g.41266229C>T

NC\_000003.11 (CTNNB1\_v001):c.226C>T|NC\_000003.11 (CTNNB1\_v002):c.226C>T|NC\_000003.11 (CTNNB1\_v003):c.226C>T|NC\_000003.11 (CTNNB1\_v004):c.226C>T|NC\_000003.11 (CTNNB1\_v005):c.226C>T|NC\_000003.11 (CTNNB1\_v006):c.226C>T|NC\_000003.11 (CTNNB1\_v007):c.205C>T

NC\_000003.11 (CTNNB1\_i001):p. (Gln76\*) |NC\_000003.11 (CTNNB1\_i002):p. (Gln76\*) |NC\_000003.11 (CTNNB1\_i003):p. (Gln76\*) |NC\_000003.11 (CTNNB1\_i004):p. (Gln76\*) |NC\_000003.11 (CTNNB1\_i005):p. (Gln76\*) |NC\_000003.11 (CTNNB1\_i006):p. (Gln76\*) |NC\_000003.11 (CTNNB1\_i007):p. (Gln69\*) AflII, MseI BpuEI, Hpy188III

NC\_000003.11:g.41266471C>T

NC\_000003.11 (CTNNB1\_v001):c.268C>T|NC\_000003.11 (CTNNB1\_v002):c.268C>T|NC\_000003.11 (CTNNB1\_v003):c.268C>T|NC\_000003.11 (CTNNB1\_v004):c.268C>T|NC\_000003.11 (CTNNB1\_v005):c.268C>T|NC\_000003.11 (CTNNB1\_v006):c.268C>T|NC\_000003.11 (CTNNB1\_v007):c.247C>T

NC\_000003.11 (CTNNB1\_i001):p. (Arg90\*) |NC\_000003.11 (CTNNB1\_i002):p. (Arg90\*) |NC\_000003.11 (CTNNB1\_i003):p. (Arg90\*) |NC\_000003.11 (CTNNB1\_i004):p. (Arg90\*) |NC\_000003.11 (CTNNB1\_i005):p. (Arg90\*) |NC\_000003.11 (CTNNB1\_i006):p. (Arg90\*) |NC\_000003.11 (CTNNB1\_i007):p. (Arg83\*) BpuEI

AvaI, BsoBI, HinfI, MlyI, PaeR7I, PleI, PspXI, TaqI, XhoI  
 NC\_000003.11:g.41266486C>T

NC\_000003.11 (CTNNB1\_v001):c.283C>T|NC\_000003.11 (CTNNB1\_v002):c.283C>T|NC\_000003.11 (CTNNB1\_v003):c.283C>T|NC\_000003.11 (CTNNB1\_v004):c.283C>T|NC\_000003.11 (CTNNB1\_v005):c.283C>T|NC\_000003.11 (CTNNB1\_v006):c.283C>T|NC\_000003.11 (CTNNB1\_v007):c.262C>T

NC\_000003.11(CTNNB1\_i001):p.(Arg95\*)|NC\_000003.11(CTNNB1\_i002):p.(Arg95\*)|NC\_000003.11(CTNNB1\_i003):p.(Arg95\*)|NC\_000003.11(CTNNB1\_i004):p.(Arg95\*)|NC\_000003.11(CTNNB1\_i005):p.(Arg95\*)|NC\_000003.11(CTNNB1\_i006):p.(Arg95\*)|NC\_000003.11(CTNNB1\_i007):p.(Arg88\*) CviQI,RsaI  
NC\_000003.11:g.41266502delC

NC\_000003.11(CTNNB1\_v001):c.299del|NC\_000003.11(CTNNB1\_v002):c.299del|NC\_000003.11(CTNNB1\_v003):c.299del|NC\_000003.11(CTNNB1\_v004):c.299del|NC\_000003.11(CTNNB1\_v005):c.299del|NC\_000003.11(CTNNB1\_v006):c.299del|NC\_000003.11(CTNNB1\_v007):c.278del

NC\_000003.11(CTNNB1\_i001):p.(Pro100Leufs\*4)|NC\_000003.11(CTNNB1\_i002):p.(Pro100Leufs\*4)|NC\_000003.11(CTNNB1\_i003):p.(Pro100Leufs\*4)|NC\_000003.11(CTNNB1\_i004):p.(Pro100Leufs\*4)|NC\_000003.11(CTNNB1\_i005):p.(Pro100Leufs\*4)|NC\_000003.11(CTNNB1\_i006):p.(Pro100Leufs\*4)|NC\_000003.11(CTNNB1\_i007):p.(Pro93Leufs\*4) Hpy188III  
NC\_000003.11:g.41266625\_41266628del

NC\_000003.11(CTNNB1\_v001):c.422\_425del|NC\_000003.11(CTNNB1\_v002):c.422\_425del|NC\_000003.11(CTNNB1\_v003):c.422\_425del|NC\_000003.11(CTNNB1\_v004):c.422\_425del|NC\_000003.11(CTNNB1\_v005):c.422\_425del|NC\_000003.11(CTNNB1\_v006):c.422\_425del|NC\_000003.11(CTNNB1\_v007):c.401\_404del

NC\_000003.11(CTNNB1\_i001):p.(Asn141Ilefs\*15)|NC\_000003.11(CTNNB1\_i002):p.(Asn141Ilefs\*15)|NC\_000003.11(CTNNB1\_i003):p.(Asn141Ilefs\*15)|NC\_000003.11(CTNNB1\_i004):p.(Asn141Ilefs\*15)|NC\_000003.11(CTNNB1\_i005):p.(Asn141Ilefs\*15)|NC\_000003.11(CTNNB1\_i006):p.(Asn141Ilefs\*15)|NC\_000003.11(CTNNB1\_i007):p.(Asn134Ilefs\*15) MseI

NC\_000003.11:g.41266699G>T (GenRecord): Mutation on splice site in gene CTNNB1 transcript 001.|(GenRecord): Mutation on splice site in gene CTNNB1 transcript 002.|(GenRecord): Mutation on splice site in gene CTNNB1 transcript 003.|(GenRecord): Mutation on splice site in gene CTNNB1 transcript 004.|(GenRecord): Mutation on splice site in gene CTNNB1 transcript 005.|(GenRecord): Mutation on splice site in gene CTNNB1 transcript 006.|(GenRecord): Mutation on splice site in gene CTNNB1 transcript 007.

NC\_000003.11(CTNNB1\_v001):c.495+1G>T|NC\_000003.11(CTNNB1\_v002):c.495+1G>T|NC\_000003.11(CTNNB1\_v003):c.495+1G>T|NC\_000003.11(CTNNB1\_v004):c.495+1G>T|NC\_000003.11(CTNNB1\_v005):c.495+1G>T|NC\_000003.11(CTNNB1\_v006):c.495+1G>T|NC\_000003.11(CTNNB1\_v007):c.474+1G>T

NC\_000003.11(CTNNB1\_i001):p.(=)|NC\_000003.11(CTNNB1\_i002):p.(=)|NC\_000003.11(CTNNB1\_i003):p.(=)|NC\_000003.11(CTNNB1\_i004):p.(=)|NC\_000003.11(CTNNB1\_i005):p.(=)|NC\_000003.11(CTNNB1\_i006):p.(=)|NC\_000003.11(CTNNB1\_i007):p.(=) BsrI,MseI BstNI,PspGI,ScrFI,SexAI,StyD4I  
NC\_000003.11:g.41266843\_41266847dupGCAGT

NC\_000003.11(CTNNB1\_v001):c.514\_518dup|NC\_000003.11(CTNNB1\_v002):c.514\_518dup|NC\_000003.11(CTNNB1\_v003):c.514\_518dup|NC\_000003.11(CTNNB1\_v004):c.514\_518dup|NC\_000003.11(CTNNB1\_v005):c.514\_518dup|NC\_000003.11(CTNNB1\_v006):c.514\_518dup|NC\_000003.11(CTNNB1\_v007):c.493\_497dup

NC\_000003.11(CTNNB1\_i001):p.(Met174Glnfs\*37)|NC\_000003.11(CTNNB1\_i002):p.(Met174Glnfs\*37)|NC\_000003.11(CTNNB1\_i003):p.(Met174Glnfs\*37)|NC\_000003.11(CTNNB1\_i004):p.(Met174Glnfs\*37)|NC\_000003.11(CTNNB1\_i005):p.(Met174Glnfs\*37)|NC\_000003.11(CTNNB1\_i006):p.(Met174Glnfs\*37)|NC\_000003.11(CTNNB1\_i007):p.(Met167Glnfs\*37) BsgI,BtsI,BtsIMutI,TsprI

NC\_000003.11:g.41266906C>T

NC\_000003.11 (CTNNB1\_v001):c.577C>T|NC\_000003.11 (CTNNB1\_v002):c.577C>T|NC\_000003.11 (CTNNB1\_v003):c.577C>T|NC\_000003.11 (CTNNB1\_v004):c.577C>T|NC\_000003.11 (CTNNB1\_v005):c.577C>T|NC\_000003.11 (CTNNB1\_v006):c.577C>T|NC\_000003.11 (CTNNB1\_v007):c.556C>T

NC\_000003.11 (CTNNB1\_i001):p. (Gln193\*)|NC\_000003.11 (CTNNB1\_i002):p. (Gln193\*)|NC\_000003.11 (CTNNB1\_i003):p. (Gln193\*)|NC\_000003.11 (CTNNB1\_i004):p. (Gln193\*)|NC\_000003.11 (CTNNB1\_i005):p. (Gln193\*)|NC\_000003.11 (CTNNB1\_i006):p. (Gln193\*)|NC\_000003.11 (CTNNB1\_i007):p. (Gln186\*)

BseRI, BspCNI, Hpy188I, MnlI  
NC\_000003.11:g.41266923del

NC\_000003.11 (CTNNB1\_v001):c.594del|NC\_000003.11 (CTNNB1\_v002):c.594del|NC\_000003.11 (CTNNB1\_v003):c.594del|NC\_000003.11 (CTNNB1\_v004):c.594del|NC\_000003.11 (CTNNB1\_v005):c.594del|NC\_000003.11 (CTNNB1\_v006):c.594del|NC\_000003.11 (CTNNB1\_v007):c.573del

NC\_000003.11 (CTNNB1\_i001):p. (Ile198Metfs\*11)|NC\_000003.11 (CTNNB1\_i002):p. (Ile198Metfs\*11)|NC\_000003.11 (CTNNB1\_i003):p. (Ile198Metfs\*11)|NC\_000003.11 (CTNNB1\_i004):p. (Ile198Metfs\*11)|NC\_000003.11 (CTNNB1\_i005):p. (Ile198Metfs\*11)|NC\_000003.11 (CTNNB1\_i006):p. (Ile198Metfs\*11)|NC\_000003.11 (CTNNB1\_i007):p. (Ile191Metfs\*11)

NC\_000003.11:g.41267064G>A (GenRecord): Mutation on splice site in gene CTNNB1 transcript 001. | (GenRecord): Mutation on splice site in gene CTNNB1 transcript 002. | (GenRecord): Mutation on splice site in gene CTNNB1 transcript 003. | (GenRecord): Mutation on splice site in gene CTNNB1 transcript 004. | (GenRecord): Mutation on splice site in gene CTNNB1 transcript 005. | (GenRecord): Mutation on splice site in gene CTNNB1 transcript 006. | (GenRecord): Mutation on splice site in gene CTNNB1 transcript 007.

NC\_000003.11 (CTNNB1\_v001):c.734+1G>A|NC\_000003.11 (CTNNB1\_v002):c.734+1G>A|NC\_000003.11 (CTNNB1\_v003):c.734+1G>A|NC\_000003.11 (CTNNB1\_v004):c.734+1G>A|NC\_000003.11 (CTNNB1\_v005):c.734+1G>A|NC\_000003.11 (CTNNB1\_v006):c.734+1G>A|NC\_000003.11 (CTNNB1\_v007):c.713+1G>A

NC\_000003.11 (CTNNB1\_i001):p. (=)|NC\_000003.11 (CTNNB1\_i002):p. (=)|NC\_000003.11 (CTNNB1\_i003):p. (=)|NC\_000003.11 (CTNNB1\_i004):p. (=)|NC\_000003.11 (CTNNB1\_i005):p. (=)|NC\_000003.11 (CTNNB1\_i006):p. (=)|NC\_000003.11 (CTNNB1\_i007):p. (=)

NC\_000003.11:g.41267215G>T

NC\_000003.11 (CTNNB1\_v001):c.799G>T|NC\_000003.11 (CTNNB1\_v002):c.799G>T|NC\_000003.11 (CTNNB1\_v003):c.799G>T|NC\_000003.11 (CTNNB1\_v004):c.799G>T|NC\_000003.11 (CTNNB1\_v005):c.799G>T|NC\_000003.11 (CTNNB1\_v006):c.799G>T|NC\_000003.11 (CTNNB1\_v007):c.778G>T

NC\_000003.11 (CTNNB1\_i001):p. (Glu267\*)|NC\_000003.11 (CTNNB1\_i002):p. (Glu267\*)|NC\_000003.11 (CTNNB1\_i003):p. (Glu267\*)|NC\_000003.11 (CTNNB1\_i004):p. (Glu267\*)|NC\_000003.11 (CTNNB1\_i005):p. (Glu267\*)|NC\_000003.11 (CTNNB1\_i006):p. (Glu267\*)|NC\_000003.11 (CTNNB1\_i007):p. (Glu260\*)

Hpy188III, HpyAV  
NC\_000003.11:g.41268760dupA

NC\_000003.11 (CTNNB1\_v001):c.998dup|NC\_000003.11 (CTNNB1\_v002):c.998dup|NC\_000003.11 (CTNNB1\_v003):c.998dup|NC\_000003.11 (CTNNB1\_v004):c.998dup|

NC\_000003.11 (CTNNB1\_v005):c.998dup|NC\_000003.11 (CTNNB1\_v006):c.998dup|NC\_000003.11 (CTNNB1\_v007):c.977dup

NC\_000003.11 (CTNNB1\_i001):p. (Tyr333\*)|NC\_000003.11 (CTNNB1\_i002):p. (Tyr333\*)|NC\_000003.11 (CTNNB1\_i003):p. (Tyr333\*)|NC\_000003.11 (CTNNB1\_i004):p. (Tyr333\*)|NC\_000003.11 (CTNNB1\_i005):p. (Tyr333\*)|NC\_000003.11 (CTNNB1\_i006):p. (Tyr333\*)|NC\_000003.11 (CTNNB1\_i007):p. (Tyr326\*) MseI  
NC\_000003.11:g.41268761C>G

NC\_000003.11 (CTNNB1\_v001):c.999C>G|NC\_000003.11 (CTNNB1\_v002):c.999C>G|NC\_000003.11 (CTNNB1\_v003):c.999C>G|NC\_000003.11 (CTNNB1\_v004):c.999C>G|NC\_000003.11 (CTNNB1\_v005):c.999C>G|NC\_000003.11 (CTNNB1\_v006):c.999C>G|NC\_000003.11 (CTNNB1\_v007):c.978C>G

NC\_000003.11 (CTNNB1\_i001):p. (Tyr333\*)|NC\_000003.11 (CTNNB1\_i002):p. (Tyr333\*)|NC\_000003.11 (CTNNB1\_i003):p. (Tyr333\*)|NC\_000003.11 (CTNNB1\_i004):p. (Tyr333\*)|NC\_000003.11 (CTNNB1\_i005):p. (Tyr333\*)|NC\_000003.11 (CTNNB1\_i006):p. (Tyr333\*)|NC\_000003.11 (CTNNB1\_i007):p. (Tyr326\*) DdeI  
NC\_000003.11:g.41268824\_41268833delins18 (grammar): Expected end of text (at char 35), (line:1, col:36)  
NC\_000003.11:g.41274840C>T

NC\_000003.11 (CTNNB1\_v001):c.1090C>T|NC\_000003.11 (CTNNB1\_v002):c.1090C>T|NC\_000003.11 (CTNNB1\_v003):c.1090C>T|NC\_000003.11 (CTNNB1\_v004):c.1090C>T|NC\_000003.11 (CTNNB1\_v005):c.1090C>T|NC\_000003.11 (CTNNB1\_v006):c.1090C>T|NC\_000003.11 (CTNNB1\_v007):c.1069C>T

NC\_000003.11 (CTNNB1\_i001):p. (Gln364\*)|NC\_000003.11 (CTNNB1\_i002):p. (Gln364\*)|NC\_000003.11 (CTNNB1\_i003):p. (Gln364\*)|NC\_000003.11 (CTNNB1\_i004):p. (Gln364\*)|NC\_000003.11 (CTNNB1\_i005):p. (Gln364\*)|NC\_000003.11 (CTNNB1\_i006):p. (Gln364\*)|NC\_000003.11 (CTNNB1\_i007):p. (Gln357\*)  
BsmI, Cac8I, HpyCH4V  
NC\_000003.11:g.41275095del

NC\_000003.11 (CTNNB1\_v001):c.1261del|NC\_000003.11 (CTNNB1\_v002):c.1261del|NC\_000003.11 (CTNNB1\_v003):c.1261del|NC\_000003.11 (CTNNB1\_v004):c.1261del|NC\_000003.11 (CTNNB1\_v005):c.1261del|NC\_000003.11 (CTNNB1\_v006):c.1261del|NC\_000003.11 (CTNNB1\_v007):c.1240del

NC\_000003.11 (CTNNB1\_i001):p. (Ala421Leufs\*16)|NC\_000003.11 (CTNNB1\_i002):p. (Ala421Leufs\*16)|NC\_000003.11 (CTNNB1\_i003):p. (Ala421Leufs\*16)|NC\_000003.11 (CTNNB1\_i004):p. (Ala421Leufs\*16)|NC\_000003.11 (CTNNB1\_i005):p. (Ala421Leufs\*16)|NC\_000003.11 (CTNNB1\_i006):p. (Ala421Leufs\*16)|NC\_000003.11 (CTNNB1\_i007):p. (Ala414Leufs\*16)  
ApaI, BaeGI, BsiHKAI, Bsp1286I, BsrI, BtsIMutI, Hpy166II, TspRI  
AluI, ApeKI, BbvI, BsgI, CviKI\_1, Fnu4HI, MspA1I, PvuII, TseI  
NC\_000003.11:g.41275137A>T

NC\_000003.11 (CTNNB1\_v001):c.1303A>T|NC\_000003.11 (CTNNB1\_v002):c.1303A>T|NC\_000003.11 (CTNNB1\_v003):c.1303A>T|NC\_000003.11 (CTNNB1\_v004):c.1303A>T|NC\_000003.11 (CTNNB1\_v005):c.1303A>T|NC\_000003.11 (CTNNB1\_v006):c.1303A>T|NC\_000003.11 (CTNNB1\_v007):c.1282A>T

NC\_000003.11 (CTNNB1\_i001):p. (Lys435\*)|NC\_000003.11 (CTNNB1\_i002):p. (Lys435\*)|NC\_000003.11 (CTNNB1\_i003):p. (Lys435\*)|NC\_000003.11 (CTNNB1\_i004):p. (Lys435\*)|NC\_000003.11 (CTNNB1\_i005):p. (Lys435\*)|NC\_000003.11 (CTNNB1\_i006):p. (Lys435\*)|NC\_000003.11 (CTNNB1\_i007):p. (Lys428\*) BfaI  
NC\_000003.11:g.41275190\_41275191insA

NC\_000003.11(CTNNB1\_v001):c.1356\_1357insA|NC\_000003.11(CTNNB1\_v002):c.1356\_1357insA|NC\_000003.11(CTNNB1\_v003):c.1356\_1357insA|NC\_000003.11(CTNNB1\_v004):c.1356\_1357insA|NC\_000003.11(CTNNB1\_v005):c.1356\_1357insA|NC\_000003.11(CTNNB1\_v006):c.1356\_1357insA|NC\_000003.11(CTNNB1\_v007):c.1335\_1336insA

NC\_000003.11(CTNNB1\_i001):p.(Arg453Thrfs\*4)|NC\_000003.11(CTNNB1\_i002):p.(Arg453Thrfs\*4)|NC\_000003.11(CTNNB1\_i003):p.(Arg453Thrfs\*4)|NC\_000003.11(CTNNB1\_i004):p.(Arg453Thrfs\*4)|NC\_000003.11(CTNNB1\_i005):p.(Arg453Thrfs\*4)|NC\_000003.11(CTNNB1\_i006):p.(Arg453Thrfs\*4)|NC\_000003.11(CTNNB1\_i007):p.(Arg446Thrfs\*4) HpyAV  
NC\_000003.11:g.41275208dup

NC\_000003.11(CTNNB1\_v001):c.1374dup|NC\_000003.11(CTNNB1\_v002):c.1374dup|NC\_000003.11(CTNNB1\_v003):c.1374dup|NC\_000003.11(CTNNB1\_v004):c.1374dup|NC\_000003.11(CTNNB1\_v005):c.1374dup|NC\_000003.11(CTNNB1\_v006):c.1374dup|NC\_000003.11(CTNNB1\_v007):c.1353dup

NC\_000003.11(CTNNB1\_i001):p.(Asp459Argfs\*4)|NC\_000003.11(CTNNB1\_i002):p.(Asp459Argfs\*4)|NC\_000003.11(CTNNB1\_i003):p.(Asp459Argfs\*4)|NC\_000003.11(CTNNB1\_i004):p.(Asp459Argfs\*4)|NC\_000003.11(CTNNB1\_i005):p.(Asp459Argfs\*4)|NC\_000003.11(CTNNB1\_i006):p.(Asp459Argfs\*4)|NC\_000003.11(CTNNB1\_i007):p.(Asp452Argfs\*4) BbsI,MboII  
NC\_000003.11:g.41275254C>T

NC\_000003.11(CTNNB1\_v001):c.1420C>T|NC\_000003.11(CTNNB1\_v002):c.1420C>T|NC\_000003.11(CTNNB1\_v003):c.1420C>T|NC\_000003.11(CTNNB1\_v004):c.1420C>T|NC\_000003.11(CTNNB1\_v005):c.1420C>T|NC\_000003.11(CTNNB1\_v006):c.1420C>T|NC\_000003.11(CTNNB1\_v007):c.1399C>T

NC\_000003.11(CTNNB1\_i001):p.(Arg474\*)|NC\_000003.11(CTNNB1\_i002):p.(Arg474\*)|NC\_000003.11(CTNNB1\_i003):p.(Arg474\*)|NC\_000003.11(CTNNB1\_i004):p.(Arg474\*)|NC\_000003.11(CTNNB1\_i005):p.(Arg474\*)|NC\_000003.11(CTNNB1\_i006):p.(Arg474\*)|NC\_000003.11(CTNNB1\_i007):p.(Arg467\*)  
AluI,MspAII,PvuII  
NC\_000003.11:g.41275303\_41275322del

NC\_000003.11(CTNNB1\_v001):c.1469\_1488del|NC\_000003.11(CTNNB1\_v002):c.1469\_1488del|NC\_000003.11(CTNNB1\_v003):c.1469\_1488del|NC\_000003.11(CTNNB1\_v004):c.1469\_1488del|NC\_000003.11(CTNNB1\_v005):c.1469\_1488del|NC\_000003.11(CTNNB1\_v006):c.1469\_1488del|NC\_000003.11(CTNNB1\_v007):c.1448\_1467del

NC\_000003.11(CTNNB1\_i001):p.(Gly490Alafs\*33)|NC\_000003.11(CTNNB1\_i002):p.(Gly490Alafs\*33)|NC\_000003.11(CTNNB1\_i003):p.(Gly490Alafs\*33)|NC\_000003.11(CTNNB1\_i004):p.(Gly490Alafs\*33)|NC\_000003.11(CTNNB1\_i005):p.(Gly490Alafs\*33)|NC\_000003.11(CTNNB1\_i006):p.(Gly490Alafs\*33)|NC\_000003.11(CTNNB1\_i007):p.(Gly483Alafs\*33) AluI,BsrI,CviKI\_1,MseI  
NC\_000003.11:g.41275660del

NC\_000003.11(CTNNB1\_v001):c.1555del|NC\_000003.11(CTNNB1\_v002):c.1555del|NC\_000003.11(CTNNB1\_v003):c.1555del|NC\_000003.11(CTNNB1\_v004):c.1555del|NC\_000003.11(CTNNB1\_v005):c.1555del|NC\_000003.11(CTNNB1\_v006):c.1555del|NC\_000003.11(CTNNB1\_v007):c.1534del

NC\_000003.11(CTNNB1\_i001):p.(Leu519Phefs\*18)|NC\_000003.11(CTNNB1\_i002):p.(Leu519Phefs\*18)|NC\_000003.11(CTNNB1\_i003):p.(Leu519Phefs\*18)|NC\_000003.11(CTNNB1\_i004):p.(Leu519Phefs\*18)|NC\_000003.11(CTNNB1\_i005):p.(Leu519Phefs\*18)|NC\_000003.11(CTNNB1\_i006):p.(Leu519Phefs\*18)|NC\_000003.11(CTNNB1\_i007):p.(Leu512Phefs\*18)

NC\_000003.11:g.41275685T>A

NC\_000003.11 (CTNNB1\_v001):c.1580T>A|NC\_000003.11 (CTNNB1\_v002):c.1580T>A|NC\_000003.11 (CTNNB1\_v003):c.1580T>A|NC\_000003.11 (CTNNB1\_v004):c.1580T>A|NC\_000003.11 (CTNNB1\_v005):c.1580T>A|NC\_000003.11 (CTNNB1\_v006):c.1580T>A|NC\_000003.11 (CTNNB1\_v007):c.1559T>A

NC\_000003.11 (CTNNB1\_i001):p. (Leu527\*)|NC\_000003.11 (CTNNB1\_i002):p. (Leu527\*)|NC\_000003.11 (CTNNB1\_i003):p. (Leu527\*)|NC\_000003.11 (CTNNB1\_i004):p. (Leu527\*)|NC\_000003.11 (CTNNB1\_i005):p. (Leu527\*)|NC\_000003.11 (CTNNB1\_i006):p. (Leu527\*)|NC\_000003.11 (CTNNB1\_i007):p. (Leu520\*) Bpu10I, DdeI

NC\_000003.11:g.41275690G>T

NC\_000003.11 (CTNNB1\_v001):c.1585G>T|NC\_000003.11 (CTNNB1\_v002):c.1585G>T|NC\_000003.11 (CTNNB1\_v003):c.1585G>T|NC\_000003.11 (CTNNB1\_v004):c.1585G>T|NC\_000003.11 (CTNNB1\_v005):c.1585G>T|NC\_000003.11 (CTNNB1\_v006):c.1585G>T|NC\_000003.11 (CTNNB1\_v007):c.1564G>T

NC\_000003.11 (CTNNB1\_i001):p. (Glu529\*)|NC\_000003.11 (CTNNB1\_i002):p. (Glu529\*)|NC\_000003.11 (CTNNB1\_i003):p. (Glu529\*)|NC\_000003.11 (CTNNB1\_i004):p. (Glu529\*)|NC\_000003.11 (CTNNB1\_i005):p. (Glu529\*)|NC\_000003.11 (CTNNB1\_i006):p. (Glu529\*)|NC\_000003.11 (CTNNB1\_i007):p. (Glu522\*)

NC\_000003.11:g.41275708C>T

NC\_000003.11 (CTNNB1\_v001):c.1603C>T|NC\_000003.11 (CTNNB1\_v002):c.1603C>T|NC\_000003.11 (CTNNB1\_v003):c.1603C>T|NC\_000003.11 (CTNNB1\_v004):c.1603C>T|NC\_000003.11 (CTNNB1\_v005):c.1603C>T|NC\_000003.11 (CTNNB1\_v006):c.1603C>T|NC\_000003.11 (CTNNB1\_v007):c.1582C>T

NC\_000003.11 (CTNNB1\_i001):p. (Arg535\*)|NC\_000003.11 (CTNNB1\_i002):p. (Arg535\*)|NC\_000003.11 (CTNNB1\_i003):p. (Arg535\*)|NC\_000003.11 (CTNNB1\_i004):p. (Arg535\*)|NC\_000003.11 (CTNNB1\_i005):p. (Arg535\*)|NC\_000003.11 (CTNNB1\_i006):p. (Arg535\*)|NC\_000003.11 (CTNNB1\_i007):p. (Arg528\*)

CviAII, FatI, NlaIII

NC\_000003.11:g.41277221delG

NC\_000003.11 (CTNNB1\_v001):c.1690del|NC\_000003.11 (CTNNB1\_v002):c.1690del|NC\_000003.11 (CTNNB1\_v003):c.1690del|NC\_000003.11 (CTNNB1\_v004):c.1690del|NC\_000003.11 (CTNNB1\_v005):c.1690del|NC\_000003.11 (CTNNB1\_v006):c.1690del|NC\_000003.11 (CTNNB1\_v007):c.1669del

NC\_000003.11 (CTNNB1\_i001):p. (Val564Serfs\*6)|NC\_000003.11 (CTNNB1\_i002):p. (Val564Serfs\*6)|NC\_000003.11 (CTNNB1\_i003):p. (Val564Serfs\*6)|NC\_000003.11 (CTNNB1\_i004):p. (Val564Serfs\*6)|NC\_000003.11 (CTNNB1\_i005):p. (Val564Serfs\*6)|NC\_000003.11 (CTNNB1\_i006):p. (Val564Serfs\*6)|NC\_000003.11 (CTNNB1\_i007):p. (Val557Serfs\*6)

NC\_000003.11:g.41277254G>A

NC\_000003.11 (CTNNB1\_v001):c.1723G>A|NC\_000003.11 (CTNNB1\_v002):c.1723G>A|NC\_000003.11 (CTNNB1\_v003):c.1723G>A|NC\_000003.11 (CTNNB1\_v004):c.1723G>A|NC\_000003.11 (CTNNB1\_v005):c.1723G>A|NC\_000003.11 (CTNNB1\_v006):c.1723G>A|NC\_000003.11 (CTNNB1\_v007):c.1702G>A

NC\_000003.11 (CTNNB1\_i001):p. (Gly575Arg)|NC\_000003.11 (CTNNB1\_i002):p. (Gly575Arg)|NC\_000003.11 (CTNNB1\_i003):p. (Gly575Arg)|NC\_000003.11 (CTNNB1\_i004):p. (Gly575Arg)|NC\_000003.11 (CTNNB1\_i005):p. (Gly575Arg)|NC\_000003.11 (CTNNB1\_i006):p. (Gly575Arg)|NC\_000003.11 (CTNNB1\_i007):p. (Gly568Arg)

BsaWI, HpaII, MspI, NlaIV

NC\_000003.11:g.41277290C>T

NC\_000003.11 (CTNNB1\_v001):c.1759C>T|NC\_000003.11 (CTNNB1\_v002):c.1759C>T|NC\_000003.11 (CTNNB1\_v003):c.1759C>T|NC\_000003.11 (CTNNB1\_v004):c.1759C>T|NC\_000003.11 (CTNNB1\_v005):c.1759C>T|NC\_000003.11 (CTNNB1\_v006):c.1759C>T|NC\_000003.11 (CTNNB1\_v007):c.1738C>T

NC\_000003.11 (CTNNB1\_i001):p. (Arg587\*)|NC\_000003.11 (CTNNB1\_i002):p. (Arg587\*)|NC\_000003.11 (CTNNB1\_i003):p. (Arg587\*)|NC\_000003.11 (CTNNB1\_i004):p. (Arg587\*)|NC\_000003.11 (CTNNB1\_i005):p. (Arg587\*)|NC\_000003.11 (CTNNB1\_i006):p. (Arg587\*)|NC\_000003.11 (CTNNB1\_i007):p. (Arg580\*)  
NC\_000003.11:g.41277903C>T

NC\_000003.11 (CTNNB1\_v001):c.1867C>T|NC\_000003.11 (CTNNB1\_v002):c.1867C>T|NC\_000003.11 (CTNNB1\_v003):c.1867C>T|NC\_000003.11 (CTNNB1\_v004):c.1867C>T|NC\_000003.11 (CTNNB1\_v005):c.1867C>T|NC\_000003.11 (CTNNB1\_v006):c.1867C>T|NC\_000003.11 (CTNNB1\_v007):c.1846C>T

NC\_000003.11 (CTNNB1\_i001):p. (Gln623\*)|NC\_000003.11 (CTNNB1\_i002):p. (Gln623\*)|NC\_000003.11 (CTNNB1\_i003):p. (Gln623\*)|NC\_000003.11 (CTNNB1\_i004):p. (Gln623\*)|NC\_000003.11 (CTNNB1\_i005):p. (Gln623\*)|NC\_000003.11 (CTNNB1\_i006):p. (Gln623\*)|NC\_000003.11 (CTNNB1\_i007):p. (Gln616\*)

BspCNI, Hpy188III, LpnPI  
NC\_000003.11:g.41277944dupC

NC\_000003.11 (CTNNB1\_v001):c.1908dup|NC\_000003.11 (CTNNB1\_v002):c.1908dup|NC\_000003.11 (CTNNB1\_v003):c.1908dup|NC\_000003.11 (CTNNB1\_v004):c.1908dup|NC\_000003.11 (CTNNB1\_v005):c.1908dup|NC\_000003.11 (CTNNB1\_v006):c.1908dup|NC\_000003.11 (CTNNB1\_v007):c.1887dup

NC\_000003.11 (CTNNB1\_i001):p. (Thr637Hisfs\*11)|NC\_000003.11 (CTNNB1\_i002):p. (Thr637Hisfs\*11)|NC\_000003.11 (CTNNB1\_i003):p. (Thr637Hisfs\*11)|NC\_000003.11 (CTNNB1\_i004):p. (Thr637Hisfs\*11)|NC\_000003.11 (CTNNB1\_i005):p. (Thr637Hisfs\*11)|NC\_000003.11 (CTNNB1\_i006):p. (Thr637Hisfs\*11)|NC\_000003.11 (CTNNB1\_i007):p. (Thr630Hisfs\*11) BanII, Bsp1286I  
NC\_000003.11:g.41277959dupA

NC\_000003.11 (CTNNB1\_v001):c.1923dup|NC\_000003.11 (CTNNB1\_v002):c.1923dup|NC\_000003.11 (CTNNB1\_v003):c.1923dup|NC\_000003.11 (CTNNB1\_v004):c.1923dup|NC\_000003.11 (CTNNB1\_v005):c.1923dup|NC\_000003.11 (CTNNB1\_v006):c.1923dup|NC\_000003.11 (CTNNB1\_v007):c.1902dup

NC\_000003.11 (CTNNB1\_i001):p. (Glu642Argfs\*6)|NC\_000003.11 (CTNNB1\_i002):p. (Glu642Argfs\*6)|NC\_000003.11 (CTNNB1\_i003):p. (Glu642Argfs\*6)|NC\_000003.11 (CTNNB1\_i004):p. (Glu642Argfs\*6)|NC\_000003.11 (CTNNB1\_i005):p. (Glu642Argfs\*6)|NC\_000003.11 (CTNNB1\_i006):p. (Glu642Argfs\*6)|NC\_000003.11 (CTNNB1\_i007):p. (Glu635Argfs\*6)  
NC\_000003.11:g.41277961\_41277962delAG

NC\_000003.11 (CTNNB1\_v001):c.1925\_1926del|NC\_000003.11 (CTNNB1\_v002):c.1925\_1926del|NC\_000003.11 (CTNNB1\_v003):c.1925\_1926del|NC\_000003.11 (CTNNB1\_v004):c.1925\_1926del|NC\_000003.11 (CTNNB1\_v005):c.1925\_1926del|NC\_000003.11 (CTNNB1\_v006):c.1925\_1926del|NC\_000003.11 (CTNNB1\_v007):c.1904\_1905del

NC\_000003.11 (CTNNB1\_i001):p. (Glu642Valfs\*5)|NC\_000003.11 (CTNNB1\_i002):p. (Glu642Valfs\*5)|NC\_000003.11 (CTNNB1\_i003):p. (Glu642Valfs\*5)|NC\_000003.11 (CTNNB1\_i004):p. (Glu642Valfs\*5)|NC\_000003.11 (CTNNB1\_i005):p. (Glu642Valfs\*5)|NC\_000003.11 (CTNNB1\_i006):p. (Glu642Valfs\*5)|NC\_000003.11 (CTNNB1\_i007):p. (Glu635Valfs\*5) HpyCH4III



NC\_000003.11:g.41278087dupG

NC\_000003.11 (CTNNB1\_v001):c.1963dup|NC\_000003.11 (CTNNB1\_v002):c.1963dup|NC\_000003.11 (CTNNB1\_v003):c.1963dup|NC\_000003.11 (CTNNB1\_v004):c.1963dup|NC\_000003.11 (CTNNB1\_v005):c.1963dup|NC\_000003.11 (CTNNB1\_v006):c.1963dup|NC\_000003.11 (CTNNB1\_v007):c.1942dup  
NC\_000003.11 (CTNNB1\_i001):p.(Ala655Glyfs\*10)|NC\_000003.11 (CTNNB1\_i002):p.(Ala655Glyfs\*10)|NC\_000003.11 (CTNNB1\_i003):p.(Ala655Glyfs\*10)|NC\_000003.11 (CTNNB1\_i004):p.(Ala655Glyfs\*10)|NC\_000003.11 (CTNNB1\_i005):p.(Ala655Glyfs\*10)|NC\_000003.11 (CTNNB1\_i006):p.(Ala655Glyfs\*10)|NC\_000003.11 (CTNNB1\_i007):p.(Ala648Glyfs\*10) HpyCH4V,MwoI  
NC\_000003.11:g.41278105C>T

NC\_000003.11 (CTNNB1\_v001):c.1981C>T|NC\_000003.11 (CTNNB1\_v002):c.1981C>T|NC\_000003.11 (CTNNB1\_v003):c.1981C>T|NC\_000003.11 (CTNNB1\_v004):c.1981C>T|NC\_000003.11 (CTNNB1\_v005):c.1981C>T|NC\_000003.11 (CTNNB1\_v006):c.1981C>T|NC\_000003.11 (CTNNB1\_v007):c.1960C>T  
NC\_000003.11 (CTNNB1\_i001):p.(Arg661\*)|NC\_000003.11 (CTNNB1\_i002):p.(Arg661\*)|NC\_000003.11 (CTNNB1\_i003):p.(Arg661\*)|NC\_000003.11 (CTNNB1\_i004):p.(Arg661\*)|NC\_000003.11 (CTNNB1\_i005):p.(Arg661\*)|NC\_000003.11 (CTNNB1\_i006):p.(Arg661\*)|NC\_000003.11 (CTNNB1\_i007):p.(Arg654\*)  
NC\_000003.11:g.41278174\_41278175delinsC

NC\_000003.11 (CTNNB1\_v001):c.2050\_2051delinsC|NC\_000003.11 (CTNNB1\_v002):c.2050\_2051delinsC|NC\_000003.11 (CTNNB1\_v003):c.2050\_2051delinsC|NC\_000003.11 (CTNNB1\_v004):c.2050\_2051delinsC|NC\_000003.11 (CTNNB1\_v005):c.2050\_2051delinsC|NC\_000003.11 (CTNNB1\_v006):c.2050\_2051delinsC|NC\_000003.11 (CTNNB1\_v007):c.2029\_2030delinsC  
NC\_000003.11 (CTNNB1\_i001):p.(Arg684Glnfs\*51)|NC\_000003.11 (CTNNB1\_i002):p.(Arg684Glnfs\*51)|NC\_000003.11 (CTNNB1\_i003):p.(Arg684Glnfs\*51)|NC\_000003.11 (CTNNB1\_i004):p.(Arg684Glnfs\*51)|NC\_000003.11 (CTNNB1\_i005):p.(Arg684Glnfs\*51)|NC\_000003.11 (CTNNB1\_i006):p.(Arg684Glnfs\*51)|NC\_000003.11 (CTNNB1\_i007):p.(Arg677Glnfs\*51) MmeI AcuI,Hpy188I  
NC\_000003.11:g.41279524\_41279525insCC

NC\_000003.11 (CTNNB1\_v001):c.2094\_2095insCC|NC\_000003.11 (CTNNB1\_v002):c.2094\_2095insCC|NC\_000003.11 (CTNNB1\_v003):c.2094\_2095insCC|NC\_000003.11 (CTNNB1\_v004):c.2094\_2095insCC|NC\_000003.11 (CTNNB1\_v005):c.2094\_2095insCC|NC\_000003.11 (CTNNB1\_v006):c.2094\_2095insCC|NC\_000003.11 (CTNNB1\_v007):c.2073\_2074insCC  
NC\_000003.11 (CTNNB1\_i001):p.(Asp699Profs\*37)|NC\_000003.11 (CTNNB1\_i002):p.(Asp699Profs\*37)|NC\_000003.11 (CTNNB1\_i003):p.(Asp699Profs\*37)|NC\_000003.11 (CTNNB1\_i004):p.(Asp699Profs\*37)|NC\_000003.11 (CTNNB1\_i005):p.(Asp699Profs\*37)|NC\_000003.11 (CTNNB1\_i006):p.(Asp699Profs\*37)|NC\_000003.11 (CTNNB1\_i007):p.(Asp692Profs\*37) BcgI (2),Hpy188I  
NC\_000003.11:g.41279542dupA

NC\_000003.11 (CTNNB1\_v001):c.2112dup|NC\_000003.11 (CTNNB1\_v002):c.2112dup|NC\_000003.11 (CTNNB1\_v003):c.2112dup|NC\_000003.11 (CTNNB1\_v004):c.2112dup|NC\_000003.11 (CTNNB1\_v005):c.2112dup|NC\_000003.11 (CTNNB1\_v006):c.2112dup|NC\_000003.11 (CTNNB1\_v007):c.2091dup  
NC\_000003.11 (CTNNB1\_i001):p.(Glu705Argfs\*9)|NC\_000003.11 (CTNNB1\_i002):p.(Glu705Argfs\*9)|NC\_000003.11 (CTNNB1\_i003):p.(Glu705Argfs\*9)|NC\_000003.11 (CTNNB1\_i004):p.(Glu705Argfs\*9)|NC\_000003.11 (CTNNB1\_i005):p.(Glu705Ar

gfs\*9)|NC\_000003.11(CTNNB1\_i006):p.(Glu705Argfs\*9)|NC\_000003.11(CTNNB1\_i007):p.(Glu698Argfs\*9) MboII  
NC\_000003.11:g.41280760delA

NC\_000003.11(CTNNB1\_v001):c.2273del|NC\_000003.11(CTNNB1\_v002):c.2273del|NC\_000003.11(CTNNB1\_v003):c.2273del|NC\_000003.11(CTNNB1\_v004):c.2273del|NC\_000003.11(CTNNB1\_v005):c.2273del|NC\_000003.11(CTNNB1\_v006):c.2273del|NC\_000003.11(CTNNB1\_v007):c.2252del

NC\_000003.11(CTNNB1\_i001):p.(His758Leufs\*30)|NC\_000003.11(CTNNB1\_i002):p.(His758Leufs\*30)|NC\_000003.11(CTNNB1\_i003):p.(His758Leufs\*33)|NC\_000003.11(CTNNB1\_i004):p.(His758Leufs\*39)|NC\_000003.11(CTNNB1\_i005):p.(His758Leufs\*30)|NC\_000003.11(CTNNB1\_i006):p.(His758Leufs\*30)|NC\_000003.11(CTNNB1\_i007):p.(His751Leufs\*33) BbvI Cac8I, NspI, SphI

20/05/2022

ADELAIDE MEDICAL SCHOOL  
FACULTY OF HEALTH AND MEDICAL  
SCIENCE

**MARK CORBETT, Ph.D.**  
LEVEL 8, ADELAIDE HEALTH & MEDICAL  
SCIENCES BLDG.,  
THE UNIVERSITY OF ADELAIDE  
SA 5005  
AUSTRALIA  
TELEPHONE +61 8 83137938  
mark.corbett@adelaide.edu.au  
CRICOS Provider Number 00123M

**Ethics Declaration:**

*“Genomic and phenotypic characterization of 404 individuals with neurodevelopmental disorders caused by CTNNB1 variants”*

Kayumi et al.

On behalf of all authors, I declare:

This study was approved by the Women’s and Children’s Health Network Human Research Ethics Committee number 2020/HRE01273. Written informed consent was obtained for all individuals for whom new data are presented in this study. Tabulated, individual-level data (Table S1) in this study are de-identified. Copies of explicit informed written consent was obtained from individuals or their legal guardian for the display of photographs (Figure 1F) and these are archived with the corresponding author.



MARK CORBETT
